# Supplementary material for: Anticoagulant prescribing for atrial fibrillation and risk of incident dementia
Source: HighWire-hosted journal article supplement (doi:10.1136/heartjnl-2021-319672), 2021-10-13
Supplement: heartjnl-2021-319672supp002_data_supplement.pdf [file heartjnl-2021-319672supp002_data_supplement.pdf]

## Anticoagulant prescribing in atrial fibrillation (AF) and incident dementia

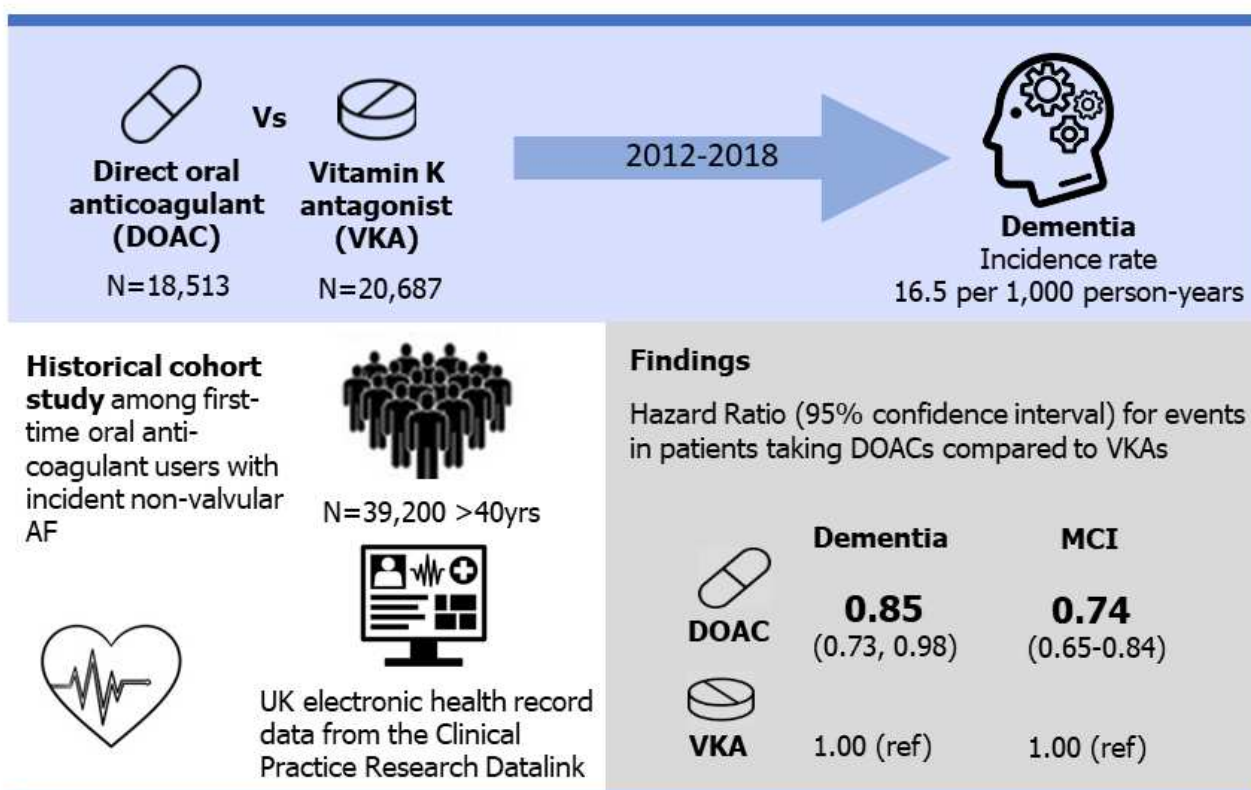

**Patients who took DOACs for treatment of AF were less likely to be diagnosed with dementia and mild cognitive impairment compared to those receiving VKAs.**
